# Supplementary material for: Efficacy of LSVT LOUD® on Phonatory Control and Voice Quality in Patients with Primary Progressive Apraxia of Speech: Case Studies
Source: MDPI journal article supplement (doi:10.3390/brainsci14050417), 2024-04-24
Supplement: s1 [file s1]

## Supplementary Materials

**Table S1.** Tau-U results for Mean Intensity

| Participant | Phase    | Sustained vowel                             | Standardized sentences                          | Personalized sentences                         | Conversation                             | Picture description                      |
|-------------|----------|---------------------------------------------|-------------------------------------------------|------------------------------------------------|------------------------------------------|------------------------------------------|
| LSVT01      | Pre-Post | <b>Tau-U = 0.50, <math>p = 0.009</math></b> | <b>Tau-U = 0.40, <math>p &lt; 0.001</math></b>  | <b>Tau-U = 0.22, <math>p = 0.014</math></b>    | <b>Tau-U = 1, <math>p = 0.030</math></b> | <b>Tau-U = 1, <math>p = 0.032</math></b> |
|             | Pre-FU1  | <b>Tau-U = 0.50, <math>p = 0.003</math></b> | <b>Tau-U = 0.48, <math>p &lt; 0.001</math></b>  | <b>Tau-U = 0.33, <math>p &lt; 0.001</math></b> | <b>Tau-U = 1, <math>p = 0.018</math></b> | <b>Tau-U = 1, <math>p = 0.015</math></b> |
|             | Pre-FU2  | <b>Tau-U = 0.50, <math>p = 0.006</math></b> | <b>Tau-U = 0.31, <math>p &lt; 0.001</math></b>  | <b>Tau-U = 0.21, <math>p = 0.019</math></b>    | <b>Tau-U = 1, <math>p = 0.018</math></b> | <b>Tau-U = 1, <math>p = 0.018</math></b> |
|             | Pre-FU3  | <b>Tau-U = 0.50, <math>p = 0.029</math></b> | <b>Tau-U = 0.42, <math>p &lt; 0.001</math></b>  | <b>Tau-U = 0.41, <math>p &lt; 0.001</math></b> | Tau-U = 0.83, $p = 0.059$                | Tau-U = 0.83, $p = 0.063$                |
| LSVT02      | Pre-Post | <b>Tau-U = 0.44, <math>p = 0.012</math></b> | <b>Tau-U = 0.32, <math>p = 0.001</math></b>     | n.a.                                           | Tau-U = -0.17, $p = 0.695$               | Tau-U = 0.56, $p = 0.157$                |
|             | Pre-FU1  | <b>Tau-U = 0.44, <math>p = 0.008</math></b> | <b>Tau-U = 0.21, <math>p = 0.031</math></b>     | n.a.                                           | Tau-U = 0.17, $p = 0.764$                | Tau-U = 0.44, $p = 0.278$                |
|             | Pre-FU2  | <b>Tau-U = 0.44, <math>p = 0.010</math></b> | <b>Tau-U = 0.21, <math>p = 0.034</math></b>     | n.a.                                           | Tau-U = 0.5, $p = 0.224$                 | Tau-U = 0.78, $p = 0.059$                |
|             | Pre-FU3  | <b>Tau-U = 0.37, <math>p = 0.033</math></b> | <b>Tau-U = -0.37, <math>p &lt; 0.001</math></b> | n.a.                                           | Tau-U = 0.06, $p = 0.970$                | Tau-U = 0.56, $p = 0.156$                |
| LSVT03      | Pre-Post | <b>Tau-U = 0.56, <math>p = 0.001</math></b> | Tau-U = 0.12, $p = 0.206$                       | <b>Tau-U = 0.34, <math>p &lt; 0.001</math></b> | Tau-U = 0.50, $p = 0.320$                | Tau-U = 0.50, $p = 0.224$                |
|             | Pre-FU1  | <b>Tau-U = 0.56, <math>p = 0.001</math></b> | Tau-U = -0.09, $p = 0.331$                      | <b>Tau-U = 0.24, <math>p = 0.007</math></b>    | Tau-U = 0.50, $p = 0.220$                | Tau-U = 0.50, $p = 0.219$                |
|             | Pre-FU2  | <b>Tau-U = 0.56, <math>p = 0.001</math></b> | <b>Tau-U = -0.22, <math>p = 0.016</math></b>    | Tau-U = 0.14, $p = 0.127$                      | Tau-U = 0.50, $p = 0.316$                | Tau-U = 0.50, $p = 0.221$                |
|             | Pre-FU3  | <b>Tau-U = 0.56, <math>p = 0.001</math></b> | Tau-U = 0.17, $p = 0.066$                       | <b>Tau-U = 0.32, <math>p &lt; 0.001</math></b> | Tau-U = 0.50, $p = 0.223$                | Tau-U = 0.50, $p = 0.221$                |

Note. CoV, coefficient of variation; dB, decibels; ST, semitones; Pre, Pre-treatment; Post, Post-treatment; FU1, follow-up 1 (1 week); FU2, follow-up 2 (4 weeks); FU3, follow-up 3, (8 weeks); n.a., not available. Significant results ( $p > 0.05$ ) shown in bold.

**Table S2.** Tau-U results for Pitch Control during Pitch Glides

| Participant | Phases   | Max F0                                       | Range upwards                                 | Min F0                                           | Range downwards                                 |
|-------------|----------|----------------------------------------------|-----------------------------------------------|--------------------------------------------------|-------------------------------------------------|
| LSVT01      | Pre-Post | Tau-U = 0.116, $p = 0.536$                   | <b>Tau-U = -0.401, <math>p = 0.027</math></b> | <b>Tau-U = -0.657, <math>p &lt; 0.000</math></b> | Tau-U = -0.234, $p = 0.075$                     |
|             | Pre-FU1  | Tau-U = 0.286, $p = 0.112$                   | Tau-U = -0.3, $p = 0.090$                     | <b>Tau-U = -0.713, <math>p &lt; 0.000</math></b> | <b>Tau-U = -0.27, <math>p = 0.026</math></b>    |
|             | Pre-FU2  | Tau-U = 0.301, $p = 0.100$                   | Tau-U = -0.352, $p = 0.051$                   | <b>Tau-U = -0.75, <math>p &lt; 0.000</math></b>  | <b>Tau-U = -0.29, <math>p = 0.021</math></b>    |
|             | Pre-Fu3  | Tau-U = 0.343, $p = 0.070$                   | Tau-U = -0.357, $p = 0.052$                   | <b>Tau-U = -0.75, <math>p &lt; 0.000</math></b>  | <b>Tau-U = -0.461, <math>p = 0.003</math></b>   |
| LSVT02      | Pre-Post | Tau-U = 0.161, $p = 0.320$                   | Tau-U = -0.036, $p = 0.841$                   | Tau-U = 0.278, $p = 0.140$                       | <b>Tau-U = -0.544, <math>p = 0.003</math></b>   |
|             | Pre-FU1  | Tau-U = 0.177, $p = 0.284$                   | Tau-U = 0.034, $p = 0.858$                    | Tau-U = -0.142, $p = 0.445$                      | <b>Tau-U = -0.355, <math>p = 0.048</math></b>   |
|             | Pre-FU2  | <b>Tau-U = 0.355, <math>p = 0.030</math></b> | Tau-U = 0.164, $p = 0.335$                    | Tau-U = 0.13, $p = 0.486$                        | <b>Tau-U = -0.515, <math>p = 0.003</math></b>   |
|             | Pre-Fu3  | Tau-U = 0.194, $p = 0.240$                   | Tau-U = -0.036, $p = 0.838$                   | <b>Tau-U = 0.5, <math>p = 0.005</math></b>       | <b>Tau-U = 0.357, <math>p = 0.003</math></b>    |
| LSVT03      | Pre-Post | Tau-U = 0.154, $p = 0.409$                   | <b>Tau-U = 0.401, <math>p = 0.028</math></b>  | <b>Tau-U = 0.625, <math>p = 0.001</math></b>     | Tau-U = 0.005, $p = 0.999$                      |
|             | Pre-FU1  | <b>Tau-U = 0.500, <math>p = 0.006</math></b> | <b>Tau-U = 0.463, <math>p = 0.009</math></b>  | <b>Tau-U = 0.625, <math>p &lt; 0.000</math></b>  | Tau-U = -0.02, $p = 0.912$                      |
|             | Pre-FU2  | Tau-U = 0.333, $p = 0.070$                   | <b>Tau-U = 0.486, <math>p = 0.008</math></b>  | <b>Tau-U = 0.625, <math>p &lt; 0.000</math></b>  | <b>Tau-U = 0.375, <math>p = 0.036</math></b>    |
|             | Pre-Fu3  | <b>Tau-U = 0.500, <math>p = 0.005</math></b> | <b>Tau-U = 0.488, <math>p = 0.008</math></b>  | <b>Tau-U = 0.625, <math>p &lt; 0.000</math></b>  | <b>Tau-U = 0.526, <math>p &lt; 0.000</math></b> |

Note. Max F0, maximum fundamental frequency; Min F0, minimum fundamental frequency; Pre, Pre-treatment; Post, Post-treatment; FU1, follow-up 1 (1 week); FU2, follow-up 2 (4 weeks); FU3, follow-up 3, (8 weeks). Statistically significant results ( $p > 0.05$ ) shown in bold.

**Table S3.** Tau-U statistics for voice quality measures.

| Participant | Phase    | AVQI                                            | CPPS                                           | HNR                                             | Shimmer%                                        | Shimmer dB                                      | Jitter                                        | Median pitch                                    |
|-------------|----------|-------------------------------------------------|------------------------------------------------|-------------------------------------------------|-------------------------------------------------|-------------------------------------------------|-----------------------------------------------|-------------------------------------------------|
| LSVT01      | Pre-Post | <b>Tau-U = -0.50, <math>p = 0.010</math></b>    | <b>Tau-U = 0.50, <math>p = 0.005</math></b>    | <b>Tau-U = 0.50, <math>p = 0.005</math></b>     | <b>Tau-U = -0.49, <math>p = 0.006</math></b>    | <b>Tau-U = -0.50, <math>p = 0.006</math></b>    | <b>Tau-U = -0.46, <math>p = 0.009</math></b>  | <b>Tau-U = 0.56, <math>p = 0.001</math></b>     |
|             | Pre-FU1  | <b>Tau-U = -0.50, <math>p = 0.004</math></b>    | <b>Tau-U = 0.50, <math>p = 0.006</math></b>    | <b>Tau-U = 0.50, <math>p = 0.005</math></b>     | <b>Tau-U = -0.50, <math>p = 0.005</math></b>    | <b>Tau-U = -0.50, <math>p = 0.005</math></b>    | <b>Tau-U = -0.46, <math>p = 0.0092</math></b> | <b>Tau-U = 0.60, <math>p &lt; 0.001</math></b>  |
|             | Pre-FU2  | <b>Tau-U = -0.50, <math>p = 0.030</math></b>    | <b>Tau-U = 0.50, <math>p = 0.004</math></b>    | <b>Tau-U = 0.50, <math>p = 0.006</math></b>     | <b>Tau-U = -0.41, <math>p = 0.0211</math></b>   | <b>Tau-U = -0.40, <math>p = 0.025</math></b>    | <b>Tau-U = -0.45, <math>p = 0.0133</math></b> | <b>Tau-U = 0.61, <math>p &lt; 0.001</math></b>  |
|             | Pre-FU3  | Tau-U = -0.17, $p = 0.706$                      | <b>Tau-U = 0.50, <math>p = 0.029</math></b>    | Tau-U = 0.17, $p = 0.502$                       | Tau-U = -0.17, $p = 0.481$                      | Tau-U = -0.17, $p = 0.490$                      | Tau-U = -0.07, $p = 0.716$                    | <b>Tau-U = 0.50, <math>p = 0.009</math></b>     |
| LSVT02      | Pre-Post | <b>Tau-U = -0.75, <math>p &lt; 0.001</math></b> | <b>Tau-U = 0.63, <math>p &lt; 0.002</math></b> | <b>Tau-U = 0.61, <math>p &lt; 0.001</math></b>  | <b>Tau-U = -0.61, <math>p &lt; 0.001</math></b> | <b>Tau-U = -0.61, <math>p &lt; 0.001</math></b> | <b>Tau-U = -0.50, <math>p = 0.007</math></b>  | <b>Tau-U = 0.63, <math>p &lt; 0.001</math></b>  |
|             | Pre-FU1  | <b>Tau-U = -0.75, <math>p &lt; 0.001</math></b> | <b>Tau-U = 0.63, <math>p &lt; 0.001</math></b> | <b>Tau-U = 0.60, <math>p &lt; 0.001</math></b>  | <b>Tau-U = -0.61, <math>p &lt; 0.001</math></b> | <b>Tau-U = -0.61, <math>p &lt; 0.001</math></b> | <b>Tau-U = -0.50, <math>p = 0.005</math></b>  | <b>Tau-U = 0.46, <math>p = 0.009</math></b>     |
|             | Pre-FU2  | <b>Tau-U = -0.75, <math>p &lt; 0.001</math></b> | <b>Tau-U = 0.64, <math>p &lt; 0.001</math></b> | <b>Tau-U = 0.58, <math>p = 0.001</math></b>     | <b>Tau-U = -0.50, <math>p = 0.005</math></b>    | <b>Tau-U = -0.49, <math>p &lt; 0.007</math></b> | <b>Tau-U = -0.50, <math>p = 0.006</math></b>  | <b>Tau-U = 0.53, <math>p = 0.003</math></b>     |
|             | Pre-FU3  | <b>Tau-U = -0.75, <math>p &lt; 0.001</math></b> | <b>Tau-U = 0.63, <math>p &lt; 0.001</math></b> | <b>Tau-U = 0.600, <math>p &lt; 0.001</math></b> | <b>Tau-U = -0.61, <math>p &lt; 0.001</math></b> | <b>Tau-U = -0.61, <math>p &lt; 0.001</math></b> | <b>Tau-U = -0.50, <math>p = 0.005</math></b>  | <b>Tau-U = 0.625, <math>p &lt; 0.001</math></b> |
| LSVT03      | Pre-Post | <b>Tau-U = -0.39, <math>p = 0.025</math></b>    | Tau-U = 0.24, $p = 0.193$                      | <b>Tau-U = 0.36, <math>p = 0.043</math></b>     | <b>Tau-U = -0.45, <math>p = 0.013</math></b>    | <b>Tau-U = -0.45, <math>p = 0.013</math></b>    | <b>Tau-U = -0.50, <math>p = 0.005</math></b>  | Tau-U = 0.24, $p = 0.185$                       |
|             | Pre-FU1  | <b>Tau-U = -0.39, <math>p = 0.025</math></b>    | Tau-U = 0.23, $p = 0.215$                      | Tau-U = 0.338, $p = 0.067$                      | <b>Tau-U = -0.40, <math>p = 0.027</math></b>    | <b>Tau-U = -0.44, <math>p = 0.014</math></b>    | <b>Tau-U = -0.50, <math>p = 0.005</math></b>  | Tau-U = 0.30, $p = 0.098$                       |
|             | Pre-FU2  | <b>Tau-U = -0.37, <math>p = 0.030</math></b>    | <b>Tau-U = 0.38, <math>p = 0.034</math></b>    | <b>Tau-U = -0.50, <math>p = 0.007</math></b>    | <b>Tau-U = -0.50, <math>p = 0.007</math></b>    | Tau-U = 0.13, $p = 0.501$                       | <b>Tau-U = 0.48, <math>p = 0.008</math></b>   | <b>Tau-U = -0.50, <math>p = 0.006</math></b>    |
|             | Pre-FU3  | <b>Tau-U = -0.36, <math>p = 0.031</math></b>    | <b>Tau-U = 0.36, <math>p = 0.044</math></b>    | <b>Tau-U = -0.40, <math>p = 0.029</math></b>    | <b>Tau-U = -0.48, <math>p = 0.007</math></b>    | Tau-U = 0.04, $p = 0.832$                       | Tau-U = 0.28, $p = 0.132$                     | <b>Tau-U = -0.50, <math>p = 0.005</math></b>    |

Note. AVQI, Acoustic Voice Quality Index; CPPS, Cepstral Peak Prominence Smoothed; HNR, Harmonic to Noise Ratio; dB, decibels; Pre, Pre-treatment; Post, Post-treatment; FU1, follow-up 1 (1 week); FU2, follow-up 2 (4 weeks); FU3, follow-up 3, (8 weeks). Statistically significant results ( $p > 0.05$ ) shown in bold

**Table S4.** Prosody – Speech and Pause measures

| Participant | Phase    | Percentage of pause                          | Speech duration                              | Total duration              | Mean pause duration                           | Mean speech duration                        |
|-------------|----------|----------------------------------------------|----------------------------------------------|-----------------------------|-----------------------------------------------|---------------------------------------------|
| LSVT01      | Pre-post | Tau-U = -0.333, $p = 0.459$                  | Tau-U = -0.166, $p = 0.692$                  | Tau-U = -0.333, $p = 0.465$ | Tau-U = -0.666, $p = 0.081$                   | Tau-U = 0.166, $p = 0.831$                  |
|             | Pre-FU1  | Tau-U = -0.277, $p = 0.536$                  | Tau-U = -0.277, $p = 0.535$                  | Tau-U = -0.500, $p = 0.226$ | Tau-U = -0.666, $p = 0.076$                   | Tau-U = 0.166, $p = 0.763$                  |
|             | Pre-FU2  | Tau-U = -0.500, $p = 0.227$                  | Tau-U = -0.500, $p = 0.216$                  | Tau-U = -0.500, $p = 0.227$ | <b>Tau-U = -0.888, <math>p = 0.030</math></b> | Tau-U = 0.277, $p = 0.531$                  |
|             | Pre-FU3  | Tau-U = -0.500, $p = 0.319$                  | Tau-U = -0.500, $p = 0.315$                  | Tau-U = -0.500, $p = 0.325$ | Tau-U = -0.833, $p = 0.061$                   | Tau-U = 0.166, $p = 0.836$                  |
| LSVT02      | Pre-post | Tau-U = -0.277, $p = 0.542$                  | Tau-U = 0.111, $p = 0.781$                   | Tau-U = 0.111, $p = 0.781$  | Tau-U = 0.055, $p = 0.970$                    | Tau-U = 0.500, $p = 0.225$                  |
|             | Pre-FU1  | Tau-U = -0.277, $p = 0.543$                  | Tau-U = 0.666, $p = 0.114$                   | Tau-U = 0.222, $p = 0.579$  | Tau-U = 0.388, $p = 0.348$                    | Tau-U = 0.500, $p = 0.220$                  |
|             | Pre-FU2  | Tau-U = -0.055, $p = 0.968$                  | <b>Tau-U = 0.000, <math>p = 0.028</math></b> | Tau-U = 0.111, $p = 0.786$  | Tau-U = -0.166, $p = 0.684$                   | Tau-U = 0.388, $p = 0.343$                  |
|             | Pre-FU3  | Tau-U = -0.388, $p = 0.322$                  | Tau-U = 0.222, $p = 0.573$                   | Tau-U = 0.111, $p = 0.780$  | Tau-U = 0.500, $p = 0.210$                    | Tau-U = 0.500, $p = 0.217$                  |
| LSVT03      | Pre-post | <b>Tau-U = -1.00, <math>p = 0.018</math></b> | Tau-U = -0.500, $p = 0.224$                  | Tau-U = -0.500, $p = 0.218$ | Tau-U = -0.500, $p = 0.212$                   | <b>Tau-U = 1.00, <math>p = 0.020</math></b> |
|             | Pre-FU1  | <b>Tau-U = -1.00, <math>p = 0.016</math></b> | Tau-U = -0.500, $p = 0.227$                  | Tau-U = -0.500, $p = 0.213$ | Tau-U = -0.500, $p = 0.210$                   | <b>Tau-U = 1.00, <math>p = 0.014</math></b> |
|             | Pre-FU2  | <b>Tau-U = -1.00, <math>p = 0.015</math></b> | Tau-U = -0.500, $p = 0.220$                  | Tau-U = -0.500, $p = 0.222$ | Tau-U = -0.166, $p = 0.687$                   | <b>Tau-U = 1.00, <math>p = 0.017</math></b> |
|             | Pre-FU3  | <b>Tau-U = -1.00, <math>p = 0.016</math></b> | Tau-U = -0.500, $p = 0.224$                  | Tau-U = -0.500, $p = 0.227$ | Tau-U = -0.500, $p = 0.233$                   | <b>Tau-U = 1.00, <math>p = 0.016</math></b> |

Note. Pre, Pre-treatment; Post, Post-treatment; FU1, follow-up 1 (1 week); FU2, follow-up 2 (4 weeks); FU3, follow-up 3, (8 weeks). Statistically significant results ( $p > 0.05$ ) shown in bold

**Table S5.** Prosody – modulations of intensity and pitch during connected speech

| Participant | Task                   | Phase    | CoV Intensity (dB)                           | CoV pitch (ST)                                  |
|-------------|------------------------|----------|----------------------------------------------|-------------------------------------------------|
| LSVT01      | Standardized sentences | Pre-Post | <b>Tau-U = -0.20, <math>p = 0.032</math></b> | <b>Tau-U = -0.36, <math>p &lt; 0.001</math></b> |
|             |                        | Pre-FU1  | <b>Tau-U = -0.24, <math>p = 0.008</math></b> | <b>Tau-U = -0.27, <math>p = 0.004</math></b>    |
|             |                        | Pre-FU2  | Tau-U = -0.16, $p = 0.083$                   | <b>Tau-U = -0.33, <math>p &lt; 0.001</math></b> |
|             |                        | Pre-FU3  | Tau-U = -0.03, $p = 0.760$                   | <b>Tau-U = -0.33, <math>p = 0.001</math></b>    |
|             | Personalized sentences | Pre-Post | Tau-U = -0.01, $p = 0.884$                   | Tau-U = 0.03, $p = 0.725$                       |
|             |                        | Pre-FU1  | Tau-U = -0.16, $p = 0.083$                   | Tau-U = 0.05, $p = 0.593$                       |
|             |                        | Pre-FU2  | Tau-U = 0.06, $p = 0.495$                    | Tau-U = -0.05, $p = 0.583$                      |
|             |                        | Pre-FU3  | Tau-U = 0.15, $p = 0.133$                    | Tau-U = -0.08, $p = 0.448$                      |
|             | Conversation           | Pre-Post | Tau-U = -0.17, $p = 0.688$                   | Tau-U = 0.17, $p = 0.827$                       |
|             |                        | Pre-FU1  | Tau-U = -0.17, $p = 0.681$                   | Tau-U = 0.06, $p = 0.967$                       |
|             |                        | Pre-FU2  | Tau-U = 0.06, $p = 0.971$                    | Tau-U = 0.39, $p = 0.347$                       |
|             |                        | Pre-FU3  | Tau-U = 0.33, $p = 0.469$                    | Tau-U = -0.17, $p = 0.693$                      |
|             | Picture description    | Pre-Post | <b>Tau-U = 1.00, <math>p = 0.032</math></b>  | Tau-U = 0.17, $p = 0.829$                       |
|             |                        | Pre-FU1  | <b>Tau-U = 0.89, <math>p = 0.032</math></b>  | Tau-U = 0.06, $p = 0.973$                       |
|             |                        | Pre-FU2  | <b>Tau-U = 0.89, <math>p = 0.032</math></b>  | Tau-U = 0.39, $p = 0.336$                       |
|             |                        | Pre-FU3  | Tau-U = 0.00, $p = 1.000$                    | Tau-U = -0.17, $p = 0.688$                      |
| LSVT02      | Standardized sentences | Pre-Post | Tau-U = -0.06, $p = 0.513$                   | Tau-U = 0.07, $p = 0.502$                       |
|             |                        | Pre-FU1  | Tau-U = -0.17, $p = 0.089$                   | Tau-U = 0.12, $p = 0.216$                       |
|             |                        | Pre-FU2  | Tau-U = 0.07, $p = 0.512$                    | Tau-U = 0.04, $p = 0.682$                       |
|             |                        | Pre-FU3  | Tau-U = 0.03, $p = 0.748$                    | <b>Tau-U = 0.20, <math>p = 0.035</math></b>     |
|             | Personalized sentences | Pre-Post | n.a.                                         | n.a.                                            |
|             |                        | Pre-FU1  | n.a.                                         | n.a.                                            |
|             |                        | Pre-FU2  | n.a.                                         | n.a.                                            |
|             |                        | Pre-FU3  | n.a.                                         | n.a.                                            |
|             | Conversation           | Pre-Post | Tau-U = -0.17, $p = 0.695$                   | Tau-U = -0.5, $p = 0.323$                       |
|             |                        | Pre-FU1  | Tau-U = -0.06, $p = 0.968$                   | Tau-U = -0.17, $p = 0.683$                      |
|             |                        | Pre-FU2  | Tau-U = 0.17, $p = 0.759$                    | Tau-U = -0.17, $p = 0.687$                      |
|             |                        | Pre-FU3  | Tau-U = -0.06, $p = 0.971$                   | Tau-U = 0.06, $p = 0.969$                       |
|             | Picture description    | Pre-Post | Tau-U = 0.17, $p = 0.759$                    | Tau-U = 0.17, $p = 0.760$                       |
|             |                        | Pre-FU1  | Tau-U = 0.17, $p = 0.763$                    | Tau-U = 0.17, $p = 0.761$                       |
|             |                        | Pre-FU2  | Tau-U = 0.17, $p = 0.763$                    | Tau-U = 0.28, $p = 0.537$                       |
|             |                        | Pre-FU3  | Tau-U = 0.17, $p = 0.757$                    | Tau-U = 0.28, $p = 0.536$                       |
| LSVT03      | Standardized sentences | Pre-Post | Tau-U = 0.16, $p = 0.087$                    | <b>Tau-U = 0.21, <math>p = 0.026</math></b>     |
|             |                        | Pre-FU1  | Tau-U = 0.09, $p = 0.343$                    | Tau-U = 0.01, $p = 0.961$                       |

|                        |          |                                                 |                             |
|------------------------|----------|-------------------------------------------------|-----------------------------|
| Personalized sentences | Pre-FU2  | Tau-U = 0.14, $p = 0.142$                       | Tau-U = -0.08, $p = 0.399$  |
|                        | Pre-FU3  | Tau-U = 0.08, $p = 0.370$                       | Tau-U = 0.14, $p = 0.129$   |
|                        | Pre-Post | <b>Tau-U = -0.21, <math>p = 0.009</math></b>    | Tau-U = 0.08, $p = 0.368$   |
|                        | Pre-FU1  | <b>Tau-U = -0.30, <math>p &lt; 0.001</math></b> | Tau-U = -0.002, $p = 0.980$ |
|                        | Pre-FU2  | <b>Tau-U = -0.26, <math>p = 0.001</math></b>    | Tau-U = -0.04, $p = 0.622$  |
| Conversation           | Pre-FU3  | Tau-U = -0.14, $p = 0.077$                      | Tau-U = 0.08, $p = 0.345$   |
|                        | Pre-Post | Tau-U = 0.50, $p = 0.316$                       | Tau-U = 0.17, $p = 0.723$   |
|                        | Pre-FU1  | Tau-U = 0.50, $p = 0.218$                       | Tau-U = 0.56, $p = 0.143$   |
|                        | Pre-FU2  | Tau-U = 0.50, $p = 0.322$                       | Tau-U = 0.00, $p = 1.000$   |
|                        | Pre-FU3  | Tau-U = 0.50, $p = 0.221$                       | Tau-U = 0.22, $p = 0.572$   |
| Picture description    | Pre-Post | Tau-U = 0.28, $p = 0.546$                       | Tau-U = 0.39, $p = 0.353$   |
|                        | Pre-FU1  | Tau-U = 0.28, $p = 0.535$                       | Tau-U = 0.06, $p = 0.969$   |
|                        | Pre-FU2  | Tau-U = -0.17, $p = 0.685$                      | Tau-U = -0.17, $p = 0.687$  |
|                        | Pre-FU3  | Tau-U = 0.39, $p = 0.343$                       | Tau-U = 0.50, $p = 0.219$   |

---

Note. CoV, coefficient of variation; dB, decibels; ST, semitones; Pre, Pre-treatment; Post, Post-treatment; FU1, follow-up 1 (1 week); FU2, follow-up 2 (4 weeks); FU3, follow-up 3, (8 weeks); n.a., not available. Statistically significant results ( $p > 0.05$ ) shown in bold.
